# Supplementary material
Source: publisher site journal article supplement (https://www.spandidos-publications.com/4261/downloadSupplementary)

Figure S1. Knockdown efficacy of the siCRABP1-1 or siCRABP1-2 alone in MKN1, MKN45 and NUGC4 cells. \*P<0.05. Error bars indicate standard deviation. si-, small interfering; CRABP1, cellular retinoic acid binding protein 1.

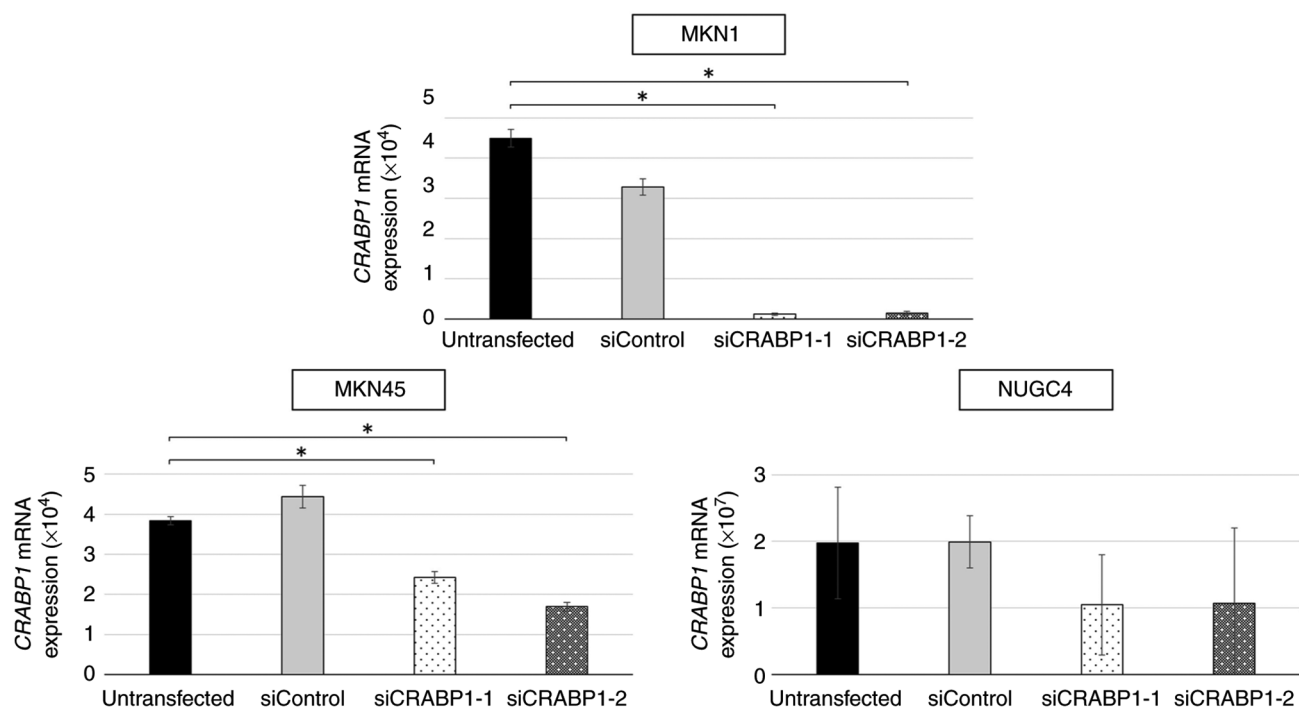

Figure S2. Knockdown efficacy of the *CRABP1* siRNA and proliferation subjected to knockdown of *CRABP1* in MKN45 cells. \*P<0.05. Error bars indicate standard deviation. si-, small interfering; CRABP1, cellular retinoic acid binding protein 1.

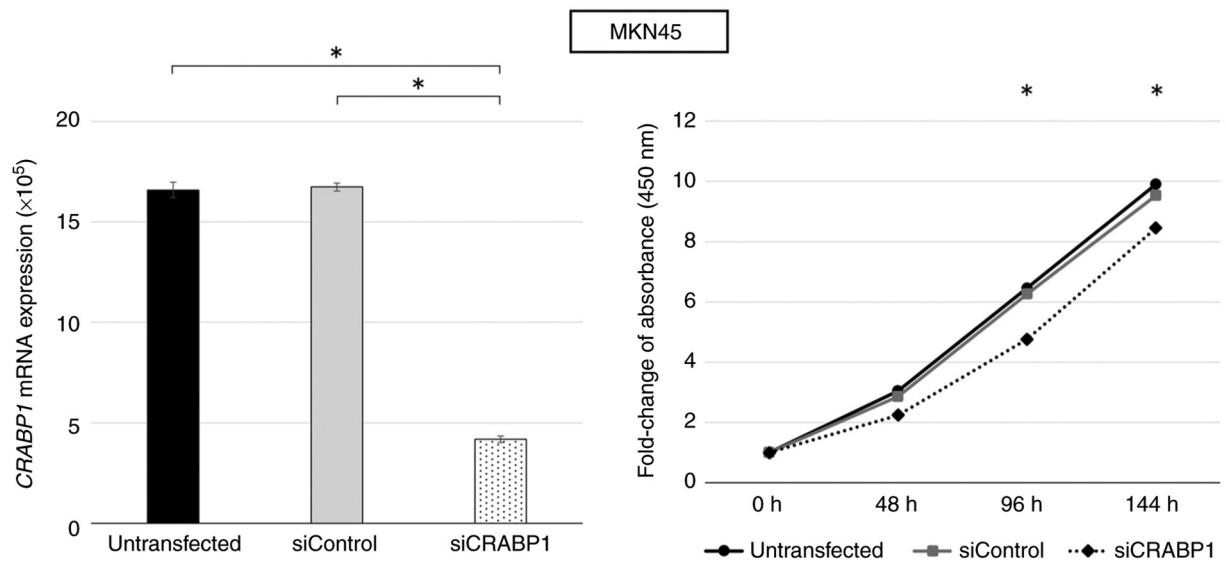

Figure S3. Effect of *CRABP1* knockdown on peritoneal metastasis formation in mouse xenograft models of NUGC4 cells. Left panels show dissemination of tumors in the peritoneal cavities of mice and all tumor nodules, and the total weight of tumor nodules is presented in the right panel. si-, small interfering; CRABP1, cellular retinoic acid binding protein 1.

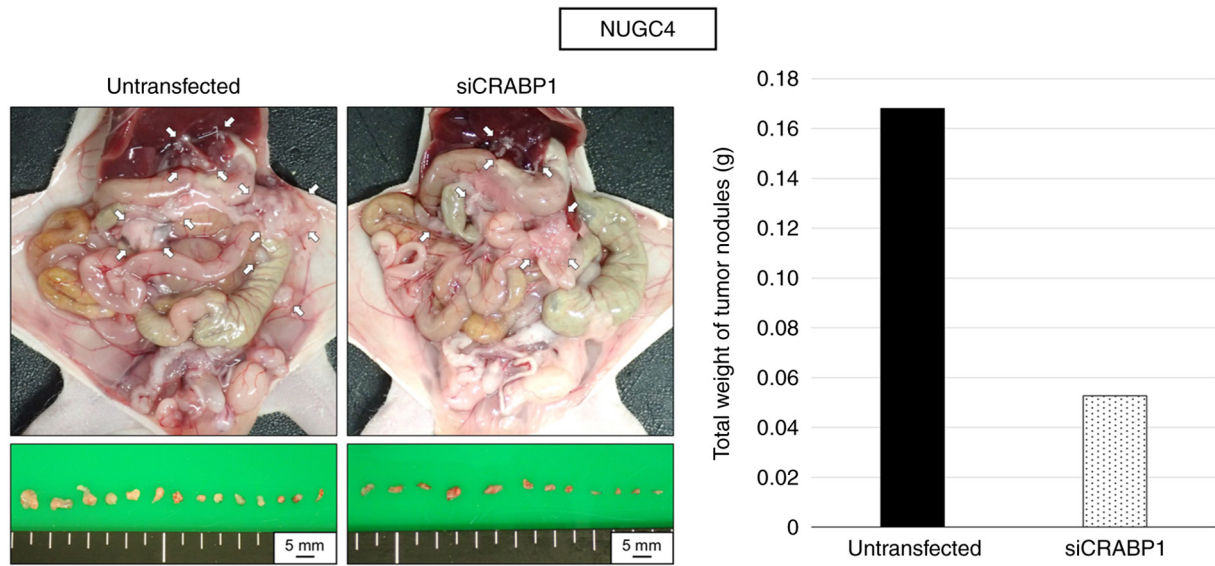

Supplement: Supplementary file 1 [file downloadSupplementary]
